# Supplementary material for: Simultaneous Mn and Cl doping on Na3V2(PO4)3 with high performance for full sodium-ion batteries
Source: Royal Society of Chemistry journal article supplement (doi:10.1039/d3dt03645f), 2024-01-01
Supplement: d3dt03645f1.pdf [file d3dt03645f1.pdf]

### 3. Results and Discussion

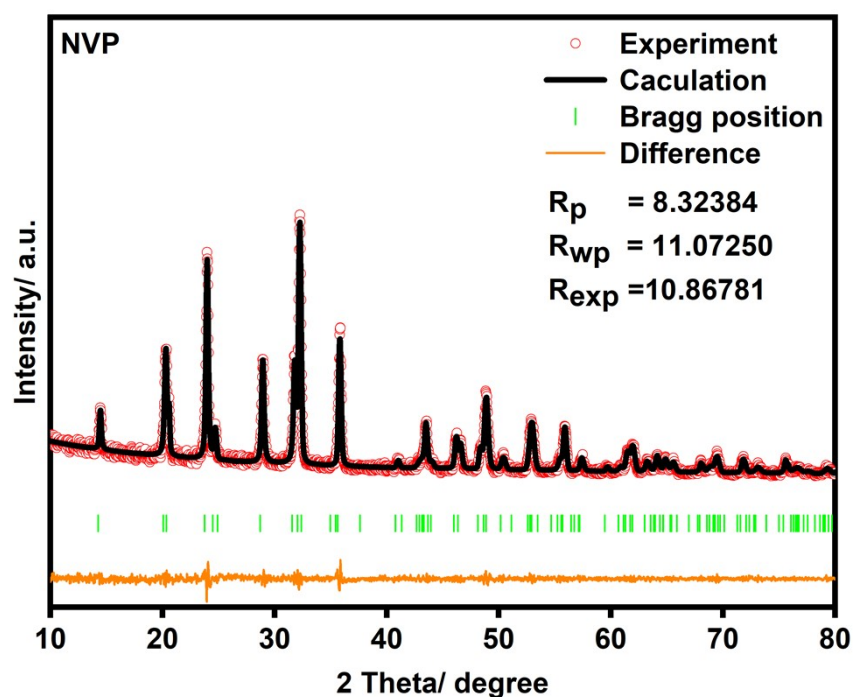

Fig.S1 Rietveld refined XRD patterns of NVP.

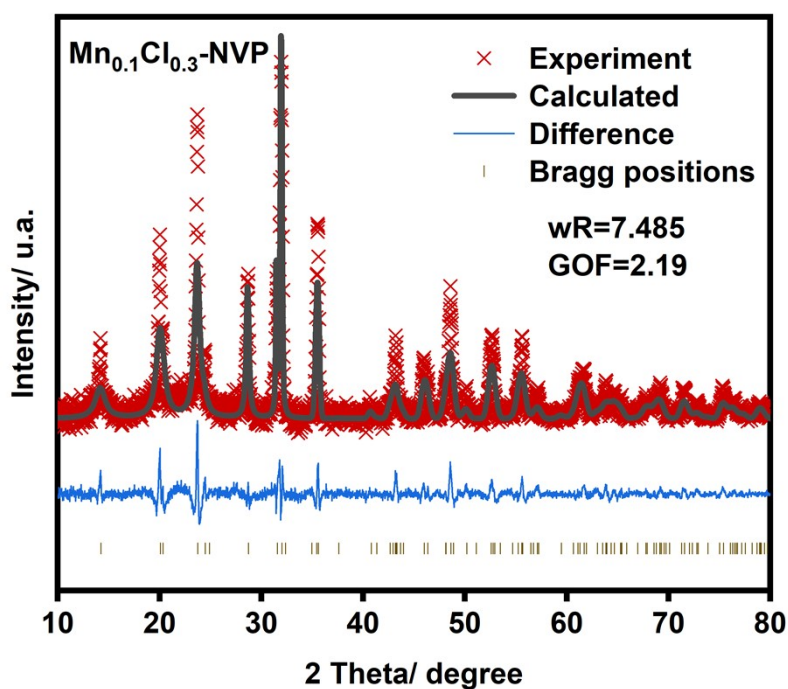

Fig.S2 Rietveld refined XRD patterns of Mn<sub>0.1</sub>Cl<sub>0.3</sub>-NVP by GSAS

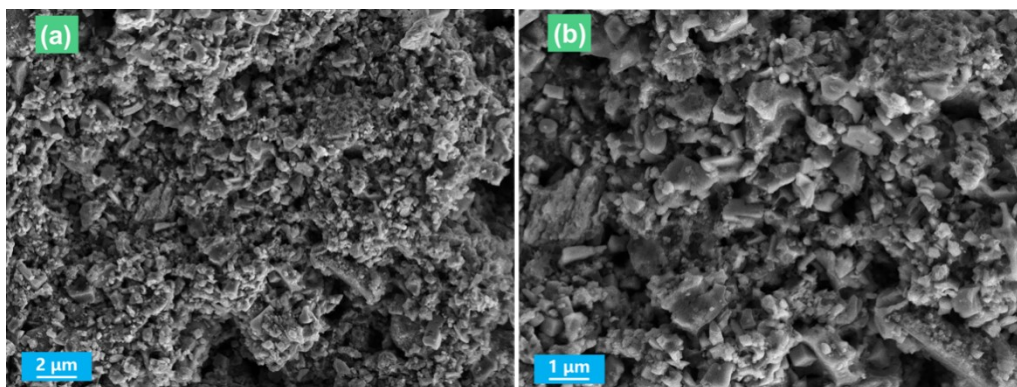

Fig.S3 SEM images of  $\text{Cl}_{0.3}\text{-NVP}$  (a and b) at the magnifications of 5k and 10k.

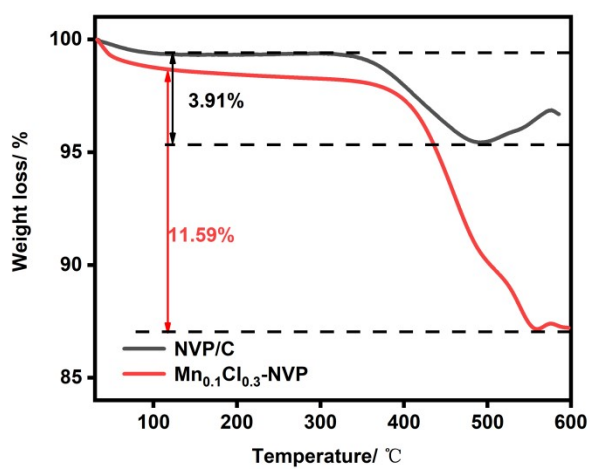

Fig.S4 The TG spectrum of NVP and  $\text{Mn}_{0.1}\text{Cl}_{0.3}\text{-NVP}$ .

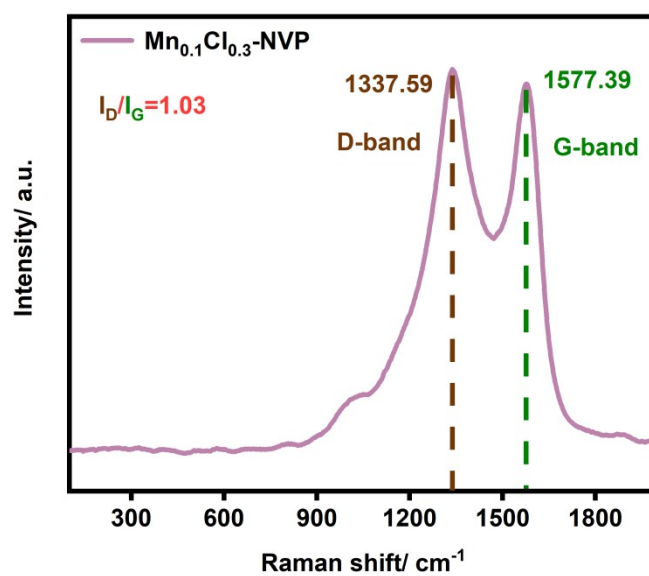

Fig.S5 Raman spectra of  $\text{Mn}_{0.1}\text{Cl}_{0.3}\text{-NVP}$ .

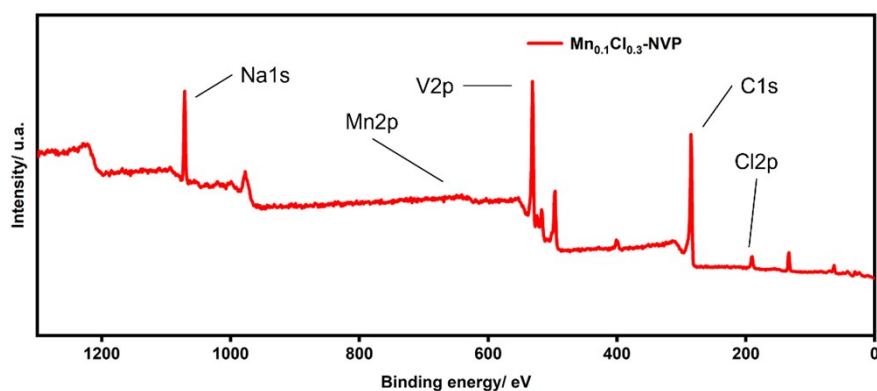

Fig.S6 XPS full spectra of  $\text{Mn}_{0.1}\text{Cl}_{0.3}\text{-NVP}$ .

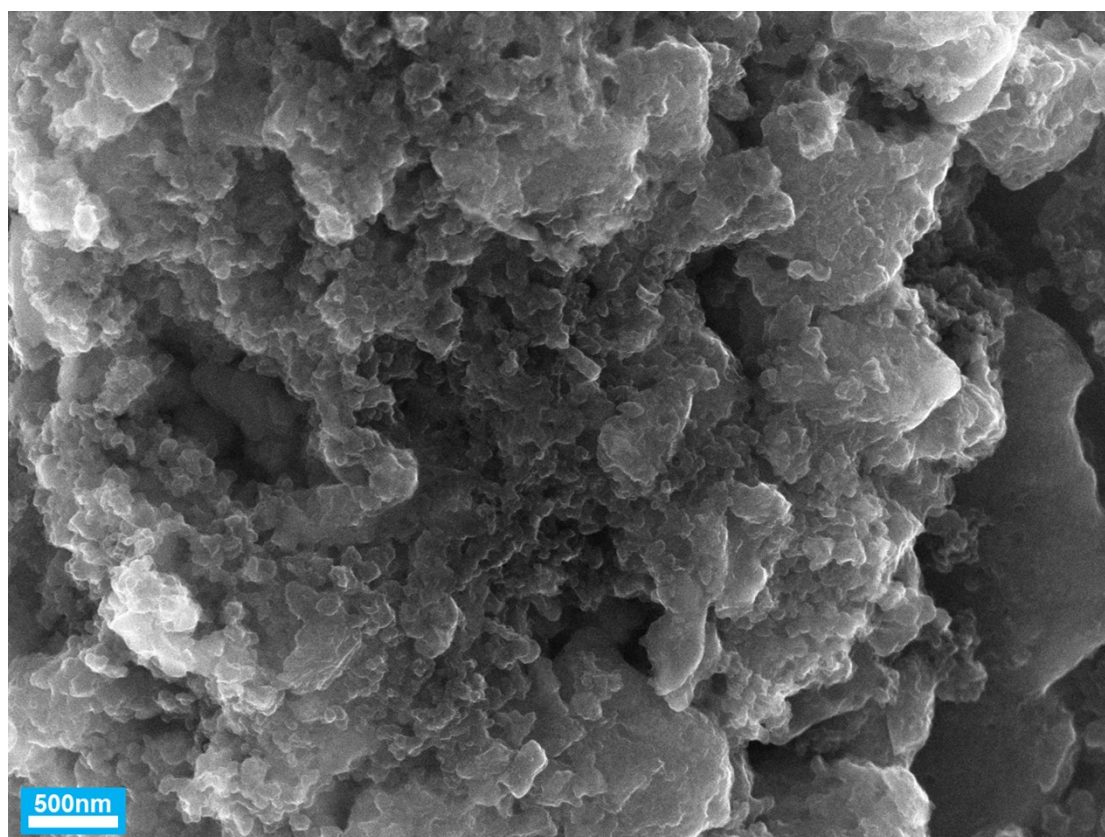

Fig.S7 SEM image of  $\text{Mn}_{0.1}\text{Cl}_{0.3}\text{-NVP}$  after 400 cycles at 10C.

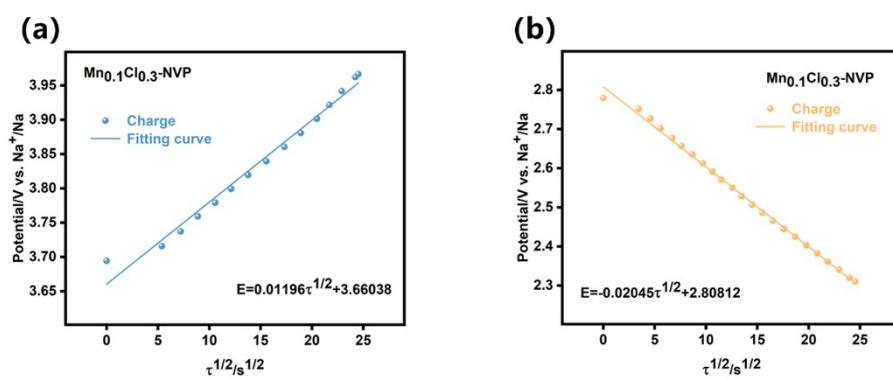

Fig.S8 Corresponding linear behavior of potential against  $\tau^{1/2}$  in (a) Charge and (b) Discharge process.
